# Supplementary material for: Effects of Patient Portal Use on Patient Satisfaction: Survey and Partial Least Squares Analysis
Source: PubMed Central journal article supplement (PMC8433860; doi:10.2196/19820), 2021-08-27
Supplement: jmir_v23i8e19820_app1.pdf [file jmir_v23i8e19820_app1.pdf]

### Multimedia Appendix 1. Key articles on patient portal use.

| Study                 | Theory and methods                                                                                 | Objective                                                                                                  | Constructs                                                                                                                                                            | Key contributions                                                                                                                                                                                                 |
|-----------------------|----------------------------------------------------------------------------------------------------|------------------------------------------------------------------------------------------------------------|-----------------------------------------------------------------------------------------------------------------------------------------------------------------------|-------------------------------------------------------------------------------------------------------------------------------------------------------------------------------------------------------------------|
| Zhong et al [9]       | Retrospective observational study of patients using portals (n=46,544)                             | To study portal function use and impacts on service use and appointment adherence of primary care patients | Portal adoption (account opened and kept activated); use: messaging, laboratory, appointment, and medication functions; outcomes: rates of primary care office visits | <ul style="list-style-type: none"> <li>Adoption of portals does not necessarily translate into use.</li> <li>Patients with active health issues or other factors adopt portals less but use them more.</li> </ul> |
| Graham et al [3]      | Two surveys, patients using portals (n=4296)                                                       | To study user satisfaction and influence of portal use on medical appointment attendance                   | Portal use, health system use, no show rates                                                                                                                          | <ul style="list-style-type: none"> <li>Portal use influenced positive patient experience, decreased health system use and rate of missed appointments</li> </ul>                                                  |
| Silver et al [15]     | TAM <sup>a</sup> and UTAUT2 <sup>b</sup> ; survey of patients at university health center (n=1142) | To study the factors that influence portal satisfaction                                                    | Portal satisfaction, portal use, health-seeking behaviors, social influence, habit, facilitating conditions, effort expectancy, and performance expectancy            | <ul style="list-style-type: none"> <li>Positive association between portal satisfaction and health-seeking behaviors and portal use and the antecedent conditions from key constructs (TAM and UTAUT2)</li> </ul> |
| McAlearney et al [10] | Qualitative, interviews of patients using portals during hospitalization (n=120)                   | To understand patient perceptions of inpatient and outpatient portals                                      | Inpatient and outpatient portals, benefits and risks                                                                                                                  | <ul style="list-style-type: none"> <li>Inpatient portals are beneficial for improving care and communicating information.</li> <li>Convenience, access to information, and better</li> </ul>                      |

|                              |                                                        |                                                                                                                                           |                                                                                                                                     |                                                                                                                                                                                                                                                |
|------------------------------|--------------------------------------------------------|-------------------------------------------------------------------------------------------------------------------------------------------|-------------------------------------------------------------------------------------------------------------------------------------|------------------------------------------------------------------------------------------------------------------------------------------------------------------------------------------------------------------------------------------------|
|                              |                                                        |                                                                                                                                           |                                                                                                                                     | engagement in care are benefits                                                                                                                                                                                                                |
| Hoogenbosch et al [20]       | UTAUT <sup>c</sup> , cross-sectional survey (n=439)    | To study portal use prevalence and influence of characteristics on portal use                                                             | Performance expectancy, effort expectancy, social influence, facilitating conditions, behavioral intention to use, and demographics | <ul style="list-style-type: none"> <li>One-third of the patients using portal expressed patient satisfaction; UTAUT factors influenced portal use</li> </ul>                                                                                   |
| Dumitrascu et al [22]        | Retrospective propensity score matching study (n=7538) | To study if patient portal use during hospitalization improves hospital outcomes                                                          | Portal use, 30-day readmissions, inpatient mortality, and 30-day mortality                                                          | <ul style="list-style-type: none"> <li>Patient portal use did not have significant influence on hospital outcomes (30-day readmission, inpatient mortality, and 30-day mortality)</li> </ul>                                                   |
| Aljabri et al [1]            | Retrospective review of patients with cancer (n=4594)  | To study portal adoption and use, associations with selected safety, use, and satisfaction measures for hospitalized patients with cancer | Demographics: age, sex, marital status, income, portal adoption, portal use, disease severity, and residence                        | <ul style="list-style-type: none"> <li>Half of the patients with cancer adopted portal; demographics (eg, age, gender, marital status, and income) and need (eg, nonlocal residence and disease severity) increased portal adoption</li> </ul> |
| Al-Ramahi and Noteboome [23] | Patient ratings in MyChart (n=500), n-gram analysis    | To study users' reviews of mobile patient portal and to identify features associated with                                                 | User ratings as proxies for user satisfaction, word-level n-grams for analysis                                                      | <ul style="list-style-type: none"> <li>Key features for portal use relate to ease of use; others include scheduling appointments and calendar.</li> <li><i>Touch ID</i> is important as well.</li> </ul>                                       |

|                       |                                                                                    |                                                                                                                                                                                              |                                                                                      |                                                                                                                                                                                             |
|-----------------------|------------------------------------------------------------------------------------|----------------------------------------------------------------------------------------------------------------------------------------------------------------------------------------------|--------------------------------------------------------------------------------------|---------------------------------------------------------------------------------------------------------------------------------------------------------------------------------------------|
|                       |                                                                                    | patient satisfaction                                                                                                                                                                         |                                                                                      |                                                                                                                                                                                             |
| Winstanley et al [13] | Convenience sample of patients (n=88)                                              | To evaluate inpatient experiences with MyChart Bedside (portal)                                                                                                                              | Ease of use, communication with nurses and physicians, and understanding medications | <ul style="list-style-type: none"> <li>• MyChart Bedside helped patients to understand medications and communicate with their provider</li> </ul>                                           |
| Fix et al [11]        | Qualitative, convenience sample; 4 patient focus groups, and one-on-one interviews | To examine factors affecting enrollment in a patient portal at patient-centered medical homes                                                                                                | Marketing efforts, administrative barriers, and logistical barriers                  | <ul style="list-style-type: none"> <li>• Patient portal adoption is worthwhile; diverse stakeholder perspectives need to be taken into account for portal adoption</li> </ul>               |
| Lin et al [6]         | Randomized controlled trial (n=606)                                                | To study the impact of a patient portal on patients' satisfaction with access to clinic and care; to study communication characteristics (email and telephone calls) from patients to clinic | Portal use, patient satisfaction, and communication                                  | <ul style="list-style-type: none"> <li>• Portal's convenience for communicating and messaging valued by portal group; increased satisfaction with communication and overall care</li> </ul> |
| Hassol et al [7]      | Patients in Geisinger Health System (n=4282)                                       | To evaluate patients' values and perceptions regarding web-based                                                                                                                             | User satisfaction, ease of use, communication preferences, completeness of           | <ul style="list-style-type: none"> <li>• Positive attitudes toward EHR and satisfaction with completeness and accuracy of medical information, but there are mild concerns</li> </ul>       |

|                      |                                                                 |                                                                                                                                                                                                            |                                                                       |                                                                                                                                                                                                                                                                                            |
|----------------------|-----------------------------------------------------------------|------------------------------------------------------------------------------------------------------------------------------------------------------------------------------------------------------------|-----------------------------------------------------------------------|--------------------------------------------------------------------------------------------------------------------------------------------------------------------------------------------------------------------------------------------------------------------------------------------|
|                      |                                                                 | communication with their primary care providers while accessing EHR <sup>d</sup>                                                                                                                           | EHR, and accuracy of the EHR                                          | about privacy and confidentiality                                                                                                                                                                                                                                                          |
| Dendere et al [12]   | Review article; meta-analysis of other articles                 | To review studies on patient portals connected with EMR <sup>e</sup> , role in patient engagement, and impact on health care delivery for identifying factors and best practices for portal implementation | Patient portals for EMR, patient engagement, and health care delivery | <ul style="list-style-type: none"> <li>• Categorized studies in input-process-output framework as predictors of portal use and engagement.</li> <li>• Patient portals improve adherence to medication and discovery of medical errors, improving provider-patient communication</li> </ul> |
| Kruse et al [21]     | Review article, CINAHL and PubMed databases (n=27 articles)     | To identify characteristics of portals deemed favorable and those deemed needs improvement by patients and providers                                                                                       | Positive and negative perceptions                                     | <ul style="list-style-type: none"> <li>• Positive: patient-provider communication.</li> <li>• Negative: security concerns and user-friendliness.</li> <li>• Review reveals mixed attitudes of patients with chronic conditions regarding portal use.</li> </ul>                            |
| Goldzweig et al [17] | Review article, PubMed and Web of Science databases (1990-2013) | To study the effect of patient portals on clinical care                                                                                                                                                    | Portal use, efficiency, use, and demographics                         | <ul style="list-style-type: none"> <li>• Insufficient evidence for patient portal influence on health outcomes, cost, and so on</li> </ul>                                                                                                                                                 |
| Rozenblum et al [24] | Review article, PubMed searched                                 | To explore the impact of HIT <sup>f</sup>                                                                                                                                                                  | HIT use and patient satisfaction                                      | <ul style="list-style-type: none"> <li>• HIT is a promising tool, but findings regarding</li> </ul>                                                                                                                                                                                        |

|  |                                                  |                            |  |                                                                     |
|--|--------------------------------------------------|----------------------------|--|---------------------------------------------------------------------|
|  | from inception to<br>May 2010 (n=56<br>articles) | on patient<br>satisfaction |  | association of HIT with<br>patient satisfaction are<br>inconsistent |
|--|--------------------------------------------------|----------------------------|--|---------------------------------------------------------------------|

<sup>a</sup>TAM: Technology Acceptance Model.

<sup>b</sup>UTAUT2: Unified Theory of Acceptance and Use of Technology 2.

<sup>c</sup>UTAUT: Unified Theory of Acceptance and Use of Technology.

<sup>d</sup>EHR: electronic health record.

<sup>e</sup>EMR: electronic medical record.

<sup>f</sup>HIT: health information technology.
